| <b>ICD 10 code</b> | <b>Explanation</b>                                                     |
|--------------------|------------------------------------------------------------------------|
| W02                | Fall involving ice-skates, skis, roller-skates or skateboards          |
| W15                | Fall from cliff                                                        |
| W17                | Other fall from one level to another                                   |
| W77                | Threat to breathing due to cave-in, falling earth and other substances |
| X31                | Exposure to excessive natural cold                                     |
| X59                | Exposure to unspecified factor causing fracture                        |
| Y86                | Sequelae of other accidents                                            |
