| Place of residence                      | Place of avalanche  |                      |                     |                      |                                      |                                         | Total |
|-----------------------------------------|---------------------|----------------------|---------------------|----------------------|--------------------------------------|-----------------------------------------|-------|
|                                         | <i>Eastern Alps</i> | <i>Southern Alps</i> | <i>Western Alps</i> | <i>Northern Alps</i> | <i>≤ 25km from the Northern Alps</i> | <i>&gt; 25km from the Northern Alps</i> |       |
| <i>Eastern Alps</i>                     | 13                  | 0                    | 0                   | 0                    | 0                                    | 0                                       | 13    |
| <i>Southern Alps</i>                    | 0                   | 1                    | 1                   | 1                    | 0                                    | 0                                       | 3     |
| <i>Western Alps</i>                     | 2                   | 0                    | 33                  | 0                    | 0                                    | 0                                       | 35    |
| <i>Northern Alps</i>                    | 4                   | 1                    | 9                   | 40                   | 0                                    | 0                                       | 54    |
| <i>≤ 25km from the Northern Alps</i>    | 19                  | 1                    | 10                  | 13                   | 1                                    | 0                                       | 44    |
| <i>&gt; 25km from the Northern Alps</i> | 18                  | 2                    | 21                  | 25                   | 0                                    | 0                                       | 66    |
| <b>Total</b>                            | 56                  | 5                    | 74                  | 79                   | 1                                    | 0                                       | 215   |
