| Characteristics               | All persons  |                   | 15-39 yrs    |                   | 40+ yrs      |                   |
|-------------------------------|--------------|-------------------|--------------|-------------------|--------------|-------------------|
|                               | Hazard ratio | 95% CI            | Hazard ratio | 95% CI            | Hazard ratio | 95% CI            |
| <b>Sex</b>                    |              | <b>p&lt;0.001</b> |              | <b>p&lt;0.001</b> |              | <b>p&lt;0.001</b> |
| Male                          | 1            |                   | 1            |                   | 1            |                   |
| Female                        | 0.195        | 0.125 - 0.304     | 0.213        | 0.111 - 0.406     | 0.181        | 0.098 - 0.335     |
| <b>Region</b>                 |              | <b>p&lt;0.001</b> |              | <b>p=0.001</b>    |              | <b>p&lt;0.001</b> |
| Eastern Alps                  | 3.249        | 1.528 - 6.911     | 2.285        | 0.686 - 7.609     | 4.353        | 1.634 - 11.60     |
| Southern Alps                 | 0.473        | 0.115 - 1.953     | 0.468        | 0.063 - 3.466     | 0.486        | 0.065 - 3.624     |
| Western Alps                  | 5.392        | 3.075 - 9.454     | 4.146        | 1.779 - 9.662     | 6.824        | 3.194 - 14.58     |
| Northern Alps                 | 2.501        | 1.626 - 3.847     | 1.968        | 1.051 - 3.684     | 3.116        | 1.712 - 5.674     |
| ≤ 25km from the Northern Alps | 1.027        | 0.652 - 1.616     | 0.806        | 0.415 - 1.566     | 1.282        | 0.684 - 2.402     |
| > 25km from the Northern Alps | 1            |                   | 1            |                   | 1            |                   |
