| Characteristics               | All persons  |                   | 15-39 yrs    |                   | 40+ yrs      |                   |
|-------------------------------|--------------|-------------------|--------------|-------------------|--------------|-------------------|
|                               | Hazard ratio | 95% CI            | Hazard ratio | 95% CI            | Hazard ratio | 95% CI            |
| <b>Sex</b>                    |              | <b>p&lt;0.001</b> |              | <b>p&lt;0.001</b> |              | <b>p=0.013</b>    |
| Male                          | 1            |                   | 1            |                   | 1            |                   |
| Female                        | 0.095        | 0.038 - 0.239     | 0.077        | 0.024 - 0.247     | 0.153        | 0.035 - 0.679     |
| <b>Region</b>                 |              | <b>p&lt;0.001</b> |              | <b>p&lt;0.001</b> |              | <b>p&lt;0.001</b> |
| Eastern Alps                  | 3.896        | 1.475 - 10.29     | 2.846        | 0.838 - 9.664     | 8.686        | 1.591 - 47.42     |
| Southern Alps                 | 0.479        | 0.065 - 3.557     | 0.606        | 0.081 - 4.538     | 0            | 0 - 0             |
| Western Alps                  | 7.875        | 3.966 - 15.63     | 6.597        | 2.963 - 14.69     | 13.72        | 3.432 - 54.86     |
| Northern Alps                 | 0.947        | 0.422 - 2.128     | 0.999        | 0.417 - 2.393     | 0.679        | 0.076 - 6.075     |
| ≤ 25km from the Northern Alps | 0.596        | 0.282 - 1.259     | 0.433        | 0.172 - 1.091     | 1.349        | 0.337 - 5.394     |
| > 25km from the Northern Alps | 1            |                   | 1            |                   | 1            |                   |
